# Supplementary material for: An agent-based model to examine neuroinvasion by SARS-CoV-2
Source: Research Square preprint supplement (doi:10.21203/rs.3.rs-1333474/v1), 2022-02-09
Supplement: Supplementary file 1 [file 6434bf2420fee38540aba453.xlsx]

## Sheet: Sheet1
10**3 AND <60 (Ticks)	10**3 AND >60 (Ticks)	10**3 AND <60 (Days)	10**3 AND >60 (Days)	22**3 AND <60 (Ticks)	22**3 AND >60 (Ticks)	22**3 AND <60 (Days)	22**3 AND >60 (Days)	46**3 AND <60 (Ticks)	46**3 AND >60 (Ticks)	46**3 AND <60 (Days)	46**3 AND >60 (Days)
222	204	11	10	260	249	13	12	209	205	10	10
241	207	12	10	255	207	13	10	238	226	12	11
222	206	11	10	200	225	10	11	209	214	10	11
224	220	11	11	210	238	11	12	224	206	11	10
232	224	12	11	214	232	11	12	237	212	12	11
243	221	12	11	210	257	11	13	213	238	11	12
225	229	11	11	200	234	10	12	204	209	10	10
235	232	12	12	240	222	12	11	197	185	10	9
249	193	12	10	219	203	11	10	228	213	11	11
238	224	12	11	221	231	11	12	216	228	11	11
240	241	12	12	214	201	11	10	211	205	11	10
241	240	12	12	206	232	10	12	243	218	12	11
223	257	11	13	226	196	11	10	204	207	10	10
249	229	12	11	241	213	12	11	235	202	12	10
273	187	14	9	202	217	10	11	201	204	10	10
259	264	13	13	199	230	10	12	198	208	10	10
205	220	10	11	234	201	12	10	220	216	11	11
227	229	11	11	240	226	12	11	211	207	11	10
246	241	12	12	234	226	12	11	205	212	10	11
279	234	14	12	207	226	10	11	222	192	11	10
229	231	11	12	213	213	11	11	210	205	11	10
238	255	12	13	238	206	12	10	216	231	11	12
241	218	12	11	208	223	10	11	218	203	11	10
239	208	12	10	253	240	13	12	188	218	9	11
248	214	12	11	195	236	10	12	242	209	12	10
229	261	11	13	252	210	13	11	253	199	13	10
229	223	11	11	240	228	12	11	187	211	9	11
230	223	12	11	229	217	11	11	207	224	10	11
230	241	12	12	232	219	12	11	239	220	12	11
250	221	13	11	245	220	12	11	240	224	12	11
246	213	12	11	226	211	11	11	233	235	12	12
208	217	10	11	210	220	11	11	223	219	11	11
228	212	11	11	216	197	11	10	210	228	11	11
222	224	11	11	202	211	10	11	208	215	10	11
243	226	12	11	215	212	11	11	218	189	11	9
241	222	12	11	203	217	10	11	195	213	10	11
245	227	12	11	208	195	10	10	224	213	11	11
247	209	12	10	206	222	10	11	201	218	10	11
258	236	13	12	210	231	11	12	238	225	12	11
265	257	13	13	221	244	11	12	219	230	11	12
225	237	11	12	208	213	10	11	210	227	11	11
223	209	11	10	240	217	12	11	201	214	10	11
232	230	12	12	232	213	12	11	212	220	11	11
201	208	10	10	234	205	12	10	209	209	10	10
224	227	11	11	215	237	11	12	216	215	11	11
252	238	13	12	222	207	11	10	220	219	11	11
185	225	9	11	226	212	11	11	230	210	12	11
241	217	12	11	211	190	11	10	222	202	11	10
212	255	11	13	215	207	11	10	264	204	13	10
224	206	11	10	214	216	11	11	208	214	10	11
222	211	11	11	217	214	11	11	214	227	11	11
231	227	12	11	210	204	11	10	248	224	12	11
241	235	12	12	231	223	12	11	230	199	12	10
228	236	11	12	239	230	12	12	252	239	13	12
232	229	12	11	223	202	11	10	199	207	10	10
267	200	13	10	224	214	11	11	207	237	10	12
216	224	11	11	237	204	12	10	229	229	11	11
229	255	11	13	235	223	12	11	205	212	10	11
249	200	12	10	260	230	13	12	216	193	11	10
229	220	11	11	206	202	10	10	235	218	12	11
263	227	13	11	212	214	11	11	198	212	10	11
233	238	12	12	230	205	12	10	249	207	12	10
236	215	12	11	223	219	11	11	238	213	12	11
239	200	12	10	225	213	11	11	221	223	11	11
244	227	12	11	257	229	13	11	215	206	11	10
270	231	14	12	255	221	13	11	200	224	10	11
227	252	11	13	270	208	14	10	239	217	12	11
240	235	12	12	231	235	12	12	226	226	11	11
240	224	12	11	225	228	11	11	242	214	12	11
248	217	12	11	239	233	12	12	232	195	12	10
250	238	13	12	231	213	12	11	217	216	11	11
230	237	12	12	209	221	10	11	214	221	11	11
244	235	12	12	227	223	11	11	235	211	12	11
216	223	11	11	228	206	11	10	213	196	11	10
224	237	11	12	210	231	11	12	203	208	10	10
216	202	11	10	209	220	10	11	218	213	11	11
248	237	12	12	201	223	10	11	191	227	10	11
233	245	12	12	198	219	10	11	230	224	12	11
234	229	12	11	190	229	10	11	182	230	9	12
240	207	12	10	243	224	12	11	183	201	9	10
227	252	11	13	211	239	11	12	213	191	11	10
232	198	12	10	221	202	11	10	234	219	12	11
216	224	11	11	219	192	11	10	200	182	10	9
223	244	11	12	175	239	9	12	243	198	12	10
219	242	11	12	248	209	12	10	221	228	11	11
243	218	12	11	252	226	13	11	220	213	11	11
249	249	12	12	256	241	13	12	219	207	11	10
230	239	12	12	227	237	11	12	215	224	11	11
259	215	13	11	253	197	13	10	201	229	10	11
252	211	13	11	244	223	12	11	212	205	11	10
259	253	13	13	222	223	11	11	227	216	11	11
243	236	12	12	222	226	11	11	244	199	12	10
224	244	11	12	267	220	13	11	201	206	10	10
225	238	11	12	212	243	11	12	214	207	11	10
281	232	14	12	236	245	12	12	212	207	11	10
224	227	11	11	197	244	10	12	223	212	11	11
236	198	12	10	233	222	12	11	239	203	12	10
233	217	12	11	230	219	12	11	201	226	10	11
260	239	13	12	223	226	11	11	209	187	10	9
214	224	11	11	229	230	11	12	212	221	11	11
